# Supplementary material
Source: ML conference proceedings conference paper supplement (https://openaccess.thecvf.com/content/WACV2024/html/Khan_Spectroformer_Multi-Domain_Query_WACV_2024_paper.html)
Supplement: Supplementary file 1 [file Khan_Spectroformer_Multi-Domain_Query_WACV_2024_supplemental.pdf]

# Spectroformer: Multi-Domain Query Cascaded Transformer Network For Underwater Image Enhancement

MD Raqib Khan, Priyanka Mishra, Nancy Mehta, Shruti S. Phutke  
Santosh Kumar Vipparthi, Sukumar Nandi, Subrahmanyam Murala

## Supplementary Material

---

### Overview

The Supplementary material includes:

- Details on loss function used for training the network.
- Quantitative results comparison of various losses settings on the UIEB dataset Table S 1
- Qualitative comparison of results obtained with various loss settings in Figure S 1.
- Qualitative results of the proposed Spectroformer and existing state-of-the-arts for underwater image restoration on real-world UCCS dataset in Figure S 2.
- Qualitative results comparison on real-world SQUID dataset in Figure S 3.
- Qualitative comparison of the proposed Spectroformer and existing state-of-the-arts for underwater image restoration on underwater real-world U45 dataset in Figure S 4.
- Application of the proposed Spectroformer and existing state-of-the-arts as pre-processing step for depth on underwater U45 dataset in Figure S 5.

### Training Losses

$$L_{Total} = \lambda_1 * L_1 + \lambda_2 * L_2 + \lambda_3 * L_3 + \lambda_4 * L_4 \quad (1)$$

Where,  $\lambda_{1,2,3,4} \in (0.03, 0.02, 0.01, 0.025)$ , Perceptual loss ( $L_1$ ), Charbonnier loss ( $L_2$ ), Multiscale Structural Similarity Index (MS-SSIM) loss ( $L_3$ ), and Gradient loss ( $L_4$ ).

#### Perceptual Loss ( $L_1$ ):

Perceptual loss provides a way to measure the perceptual similarity between generated and target images using the feature representations of a pre-trained neural network. It has proven effective in enhancing the quality of generated images in various image generation tasks. Let  $O$  be the target image and  $G_t$  be the generated image. We use a pre-trained VGG19 network ( $\phi_i$ ) to extract feature maps at different layers. The perceptual loss,  $L_1$ , is then computed as the difference between the feature maps of the target and restored images:

$$L_1 = \sum_{i=1}^{N=4} \|\phi_i(O) - \phi_i(G_t)\|_2^2 \quad (2)$$

Here,  $\phi_i$  represents the feature extraction function at layer  $i$  of the CNN, and ( $N = 4$ ) is the total number of layers considered for perceptual loss calculation.

#### Charbonnier loss ( $L_2$ ):

Using the MSE loss to train the network generally causes blurry reconstruction because it maximizes the log-likelihood of a Gaussian distribution. We opted for the Charbonnier loss, a differentiable version of the  $L_1$  norm, to avoid this issue. The Charbonnier loss is determined between the restored image images ( $O$ ) and their corresponding ground-truth image ( $G_t$ ), and it is defined as follows:

$$L_2 = \mathbb{E}_{O \sim Q(O), G_t \sim Q(G_t)} \sqrt{(O - G_t)^2 + \epsilon} \quad (3)$$

Where,  $Q(O)$  and  $Q(G_t)$  are the distributions of the restored image ( $O$ ) and the ground-truth image ( $G_t$ ), respectively. Additionally, the value of  $\epsilon$  is empirically set to  $1 \times 10^{-3}$ .

### MS-SSIM loss ( $L_3$ ):

The Structural Similarity (SSIM) loss primarily deals with a single input resolution. In contrast, the Multiscale SSIM (MS-SSIM) loss offers greater flexibility by considering different input resolutions.

$$L_3 = 1 - (MSSSIM(O, G_t)) \quad (4)$$

### Gradient loss ( $L_4$ ):

Generally, the Charbonnier loss prioritizes low-frequency components. However, when training the network to incorporate high-frequency details, the gradient loss plays an important role. It is a second-order loss function that enhances the sharpness of edges in the output [1].  $\hat{G}_O$  and  $\hat{G}_{G_t}$  represents distribution of  $Q(O)$  and  $Q(G_t)$  respectively.

$$L_4 = \mathbb{E}_{\hat{G}_O \sim Q(O), \hat{G}_{G_t} \sim Q(G_t)} \left\| \hat{G}_{G_t} - \hat{G}_O \right\|_1 \quad (5)$$

Table S 1: Quantitative results comparison of various loss settings on the UIEB dataset ( $L_1$ : Perceptual loss,  $L_2$ : Charbonnier loss,  $L_3$ : Multiscale Structural Similarity Index (MS-SSIM) loss and  $L_4$ : Gradient loss).

| Loss settings           | PSNR         | SSIM         |
|-------------------------|--------------|--------------|
| $L_1$                   | 21.99        | 0.866        |
| $L_1 + L_2$             | 22.04        | 0.886        |
| $L_1 + L_2 + L_3$       | 24.61        | 0.901        |
| $L_1 + L_2 + L_3 + L_4$ | <b>24.96</b> | <b>0.917</b> |

### Qualitative Comparison of Results Obtained with Various Loss Settings

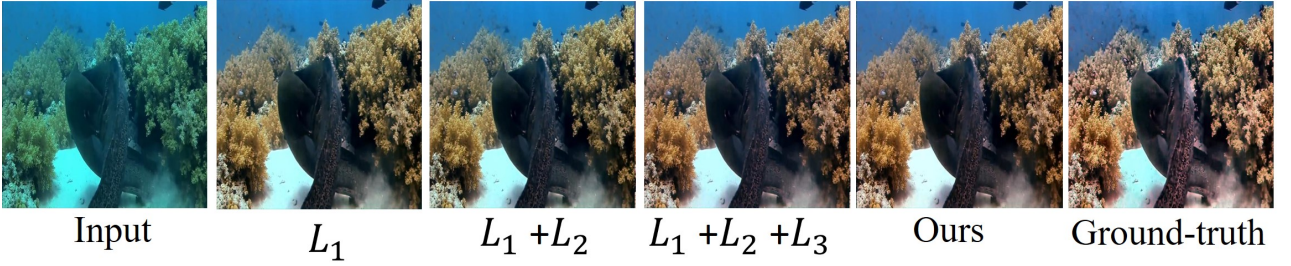

Figure S 1: Qualitative comparison of results obtained with various loss settings.

### Results on Real-world UCCS Dataset

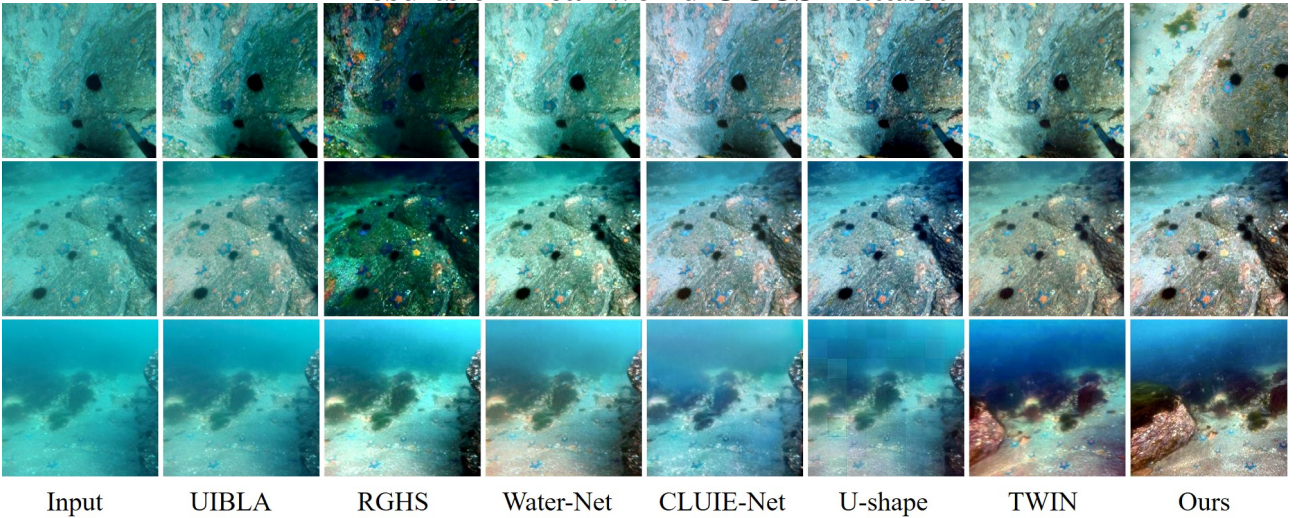

Figure S 2: Qualitative comparison of the proposed method (Ours) with existing state-of-the-art methods (UIBLA [2], RGHS [3], Water-Net [4], CLUIE-Net [5], U-shape [6], TWIN [7]) for underwater image restoration on real-world UCCS dataset [8].

### Results on Real-world SQUID Dataset

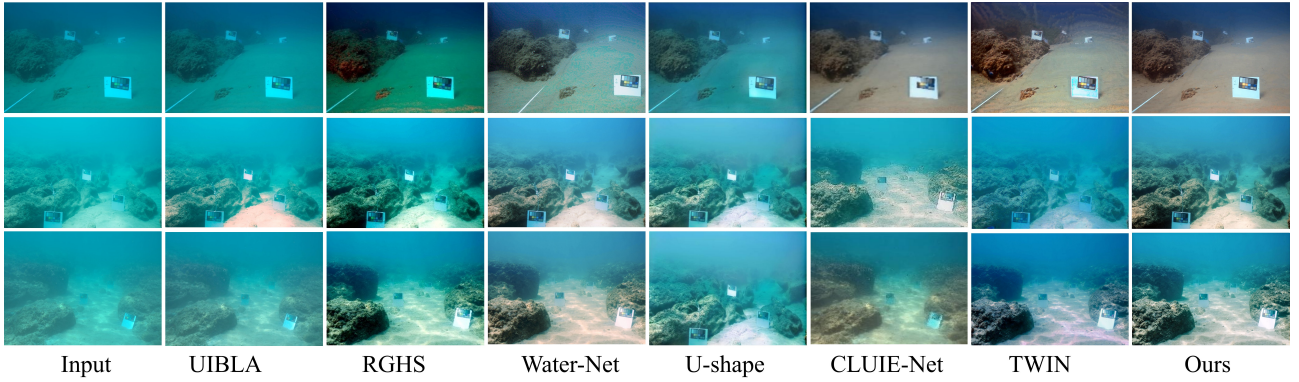

Figure S 3: Qualitative results comparison of state-of-the-art (UIBLA [2], RGHS [3], Water-Net [4], CLUIE-Net [5], U-shape [6], TWIN [7]) and the proposed method (Ours) on SQUID dataset [9] for underwater image restoration.

### Underwater Image Restoration on real-world U45 Dataset

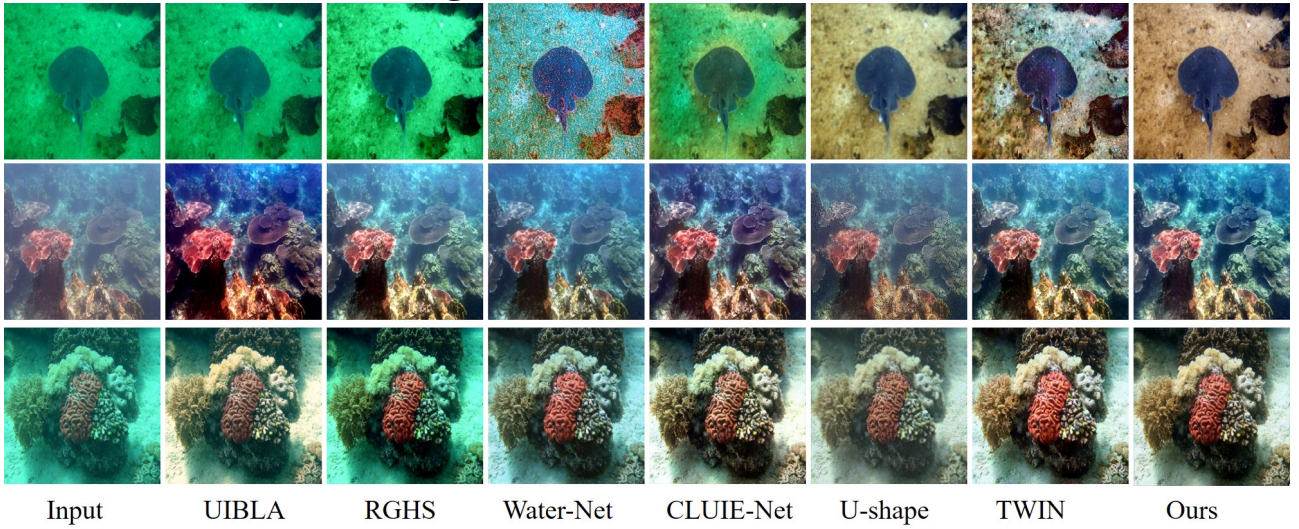

Figure S 4: Qualitative comparison of the proposed method (Ours) with existing state-of-the-art methods (UIBLA [2], RGHS [3], Water-Net [4], CLUIE-Net [5], U-shape [6], TWIN [7]) for underwater image restoration on real-world U45 dataset [8].

### Depth-map of Degraded and Restored Images on Real-world U45 Dataset

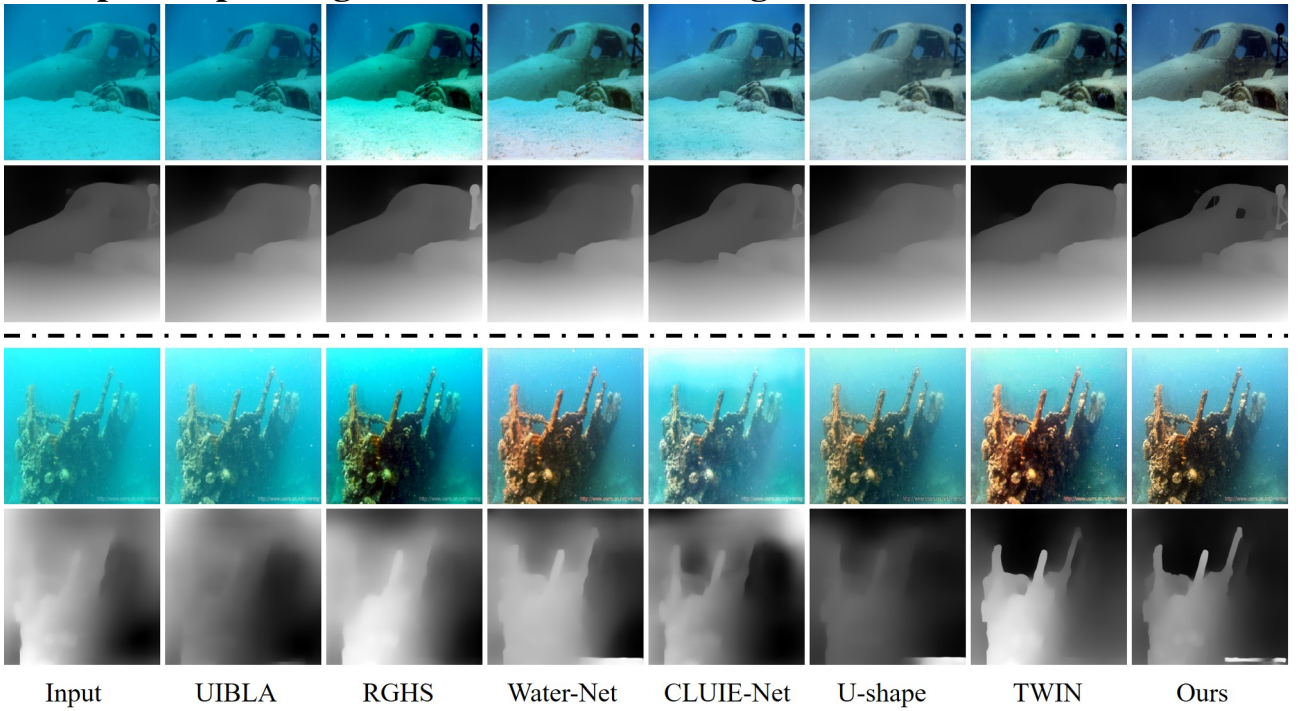

Figure S 5: Application of the proposed Spectroformer and existing state-of-the-arts (UIBLA [2], RGHS [3], Water-Net [4], CLUIE-Net [5], U-shape [6], TWIN [7]) as a pre-processing step for depth-estimation on underwater U45 dataset [10].

## References

- [1] M. Mathieu, C. Couprie, and Y. LeCun, “Deep multi-scale video prediction beyond mean square error,” *arXiv preprint arXiv:1511.05440*, 2015.
- [2] Y.-T. Peng and P. C. Cosman, “Underwater image restoration based on image blurriness and light absorption,” *IEEE transactions on image processing*, vol. 26, no. 4, pp. 1579–1594, 2017.
- [3] D. Huang, Y. Wang, W. Song, J. Sequeira, and S. Mavromatis, “Shallow-water image enhancement using relative global histogram stretching based on adaptive parameter acquisition,” in *MultiMedia Modeling: 24th International Conference, MMM 2018, Bangkok, Thailand, February 5-7, 2018, Proceedings, Part I 24*. Springer, 2018, pp. 453–465.
- [4] C. Li, C. Guo, W. Ren, R. Cong, J. Hou, S. Kwong, and D. Tao, “An underwater image enhancement benchmark dataset and beyond,” *IEEE Transactions on Image Processing*, vol. 29, pp. 4376–4389, 2019.
- [5] K. Li, L. Wu, Q. Qi, W. Liu, X. Gao, L. Zhou, and D. Song, “Beyond single reference for training: underwater image enhancement via comparative learning,” *IEEE Transactions on Circuits and Systems for Video Technology*, 2022.
- [6] L. Peng, C. Zhu, and L. Bian, “U-shape transformer for underwater image enhancement,” in *Computer Vision—ECCV 2022 Workshops: Tel Aviv, Israel, October 23–27, 2022, Proceedings, Part II*. Springer, 2023, pp. 290–307.
- [7] R. Liu, Z. Jiang, S. Yang, and X. Fan, “Twin adversarial contrastive learning for underwater image enhancement and beyond,” *IEEE Transactions on Image Processing*, vol. 31, pp. 4922–4936, 2022.
- [8] H. Li, J. Li, and W. Wang, “A fusion adversarial underwater image enhancement network with a public test dataset,” *arXiv preprint arXiv:1906.06819*, 2019.
- [9] D. Berman, T. Treibitz, and S. Avidan, “Single image dehazing using haze-lines,” *IEEE transactions on pattern analysis and machine intelligence*, vol. 42, no. 3, pp. 720–734, 2018.
- [10] M. J. Islam, P. Luo, and J. Sattar, “Simultaneous enhancement and super-resolution of underwater imagery for improved visual perception,” *arXiv preprint arXiv:2002.01155*, 2020.
